# Supplementary material for: Rrp5p, Noc1p and Noc2p form a protein module which is part of early large ribosomal subunit precursors in S. cerevisiae
Source: PubMed Central journal article supplement — Nucleic Acids Res. 2012 Dec 2;41(2):1191–210. doi: 10.1093/nar/gks1056 (PMC3553968; doi:10.1093/nar/gks1056), 2012-12-02
Supplement: supp_gks1056_nar-01373-v-2012-File010.pdf [file supp_gks1056_nar-01373-v-2012-File010.pdf]

# Supplemental Material

## Supplementary Figures:

Figure S1

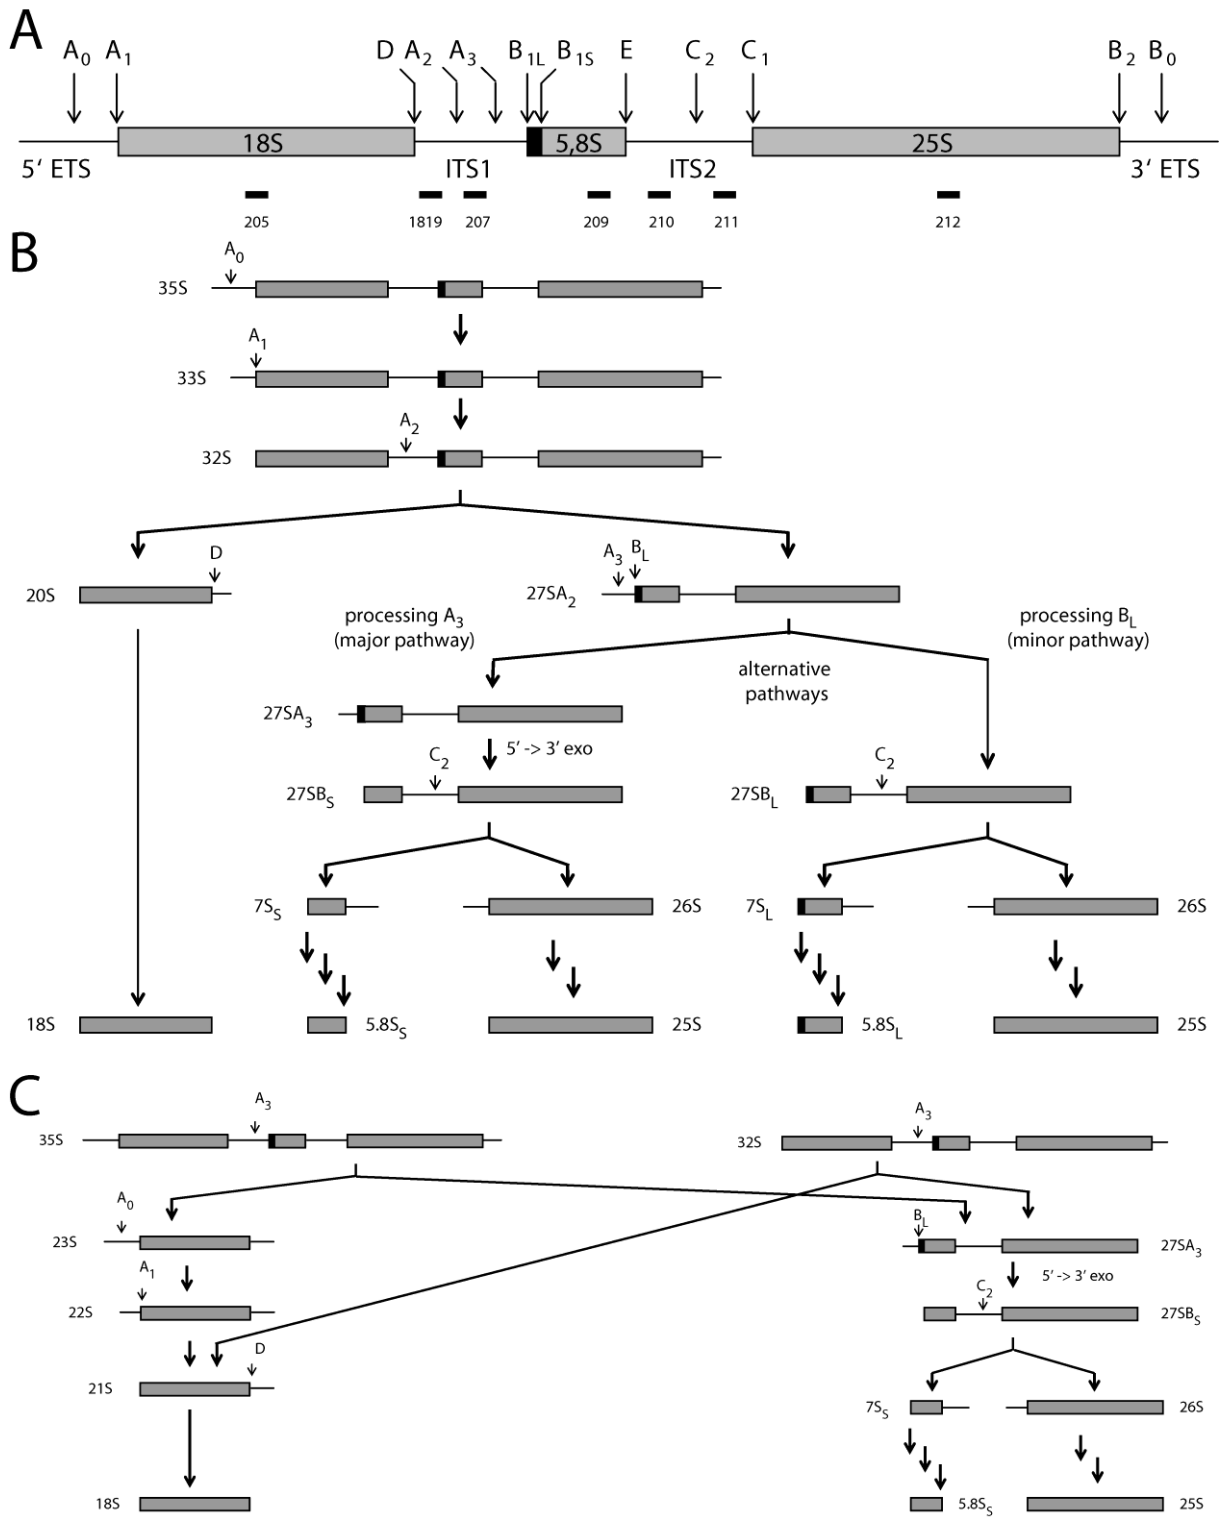

## **Fig. S1 rRNA processing in *S. cerevisiae***

A) The 35S rRNA gene contains the sequences of 18S, 5.8S and 25S rRNAs separated by two internal transcribed spacer (ITS1, ITS2) regions and flanked by external transcribed spacer regions (5'-ETS, 3'-ETS). Processing sites of precursor rRNAs are indicated (A0, A1, etc.). Positions of antisense oligo probes (o205, etc.) used for Northern hybridisation and primer extension analyses are indicated with bars.

### **B) Canonical pre-rRNA processing pathways**

Processing of the 35S pre-rRNA at sites A0 and A1 generates 32S rRNA, which contains the 5' end of the 18S rRNA. Subsequent cleavage at site A2 separates 20S pre-rRNA from 27SA2 pre-rRNA, which further on mature independently. The 27SA2 pre-rRNA is processed via two mutually exclusive pathways. Processing at site A3 and subsequent 5'→3' exonucleolytic trimming to site B1<sub>S</sub> yields the 27SB<sub>S</sub> pre-rRNA, having the 5' end of the major 5.8S<sub>S</sub> rRNA. Alternatively, processing at site B1<sub>L</sub> yields 27SB<sub>L</sub> pre-rRNA, having the 5' end of the minor 5.8S<sub>L</sub> rRNA. Processing of 27SB<sub>L</sub>/27SB<sub>S</sub> pre-rRNAs at site C2 separates the precursors of 25S and 5.8S<sub>L</sub> or 5.8S<sub>S</sub>, respectively, which are subsequently converted into the mature species by exonucleolytic trimming. Processing at site D converts the 20S precursor into 18S rRNA.

### **C) Alternative pre-rRNA processing pathways bypassing A2-site processing**

In mutants, in which processing at site A2 is impaired, but also to a low extent in normal yeast cells, separation of the precursors of small subunit and large subunit components can occur by processing 35S or 32S pre-rRNAs at site A3, resulting in 27SA3 and 23S or 21S pre-rRNAs, respectively. Processing at sites A0 and A1 converts 23S into 21S pre-rRNA which can possibly be processed at site D to yield 18S rRNA.

Figure S2

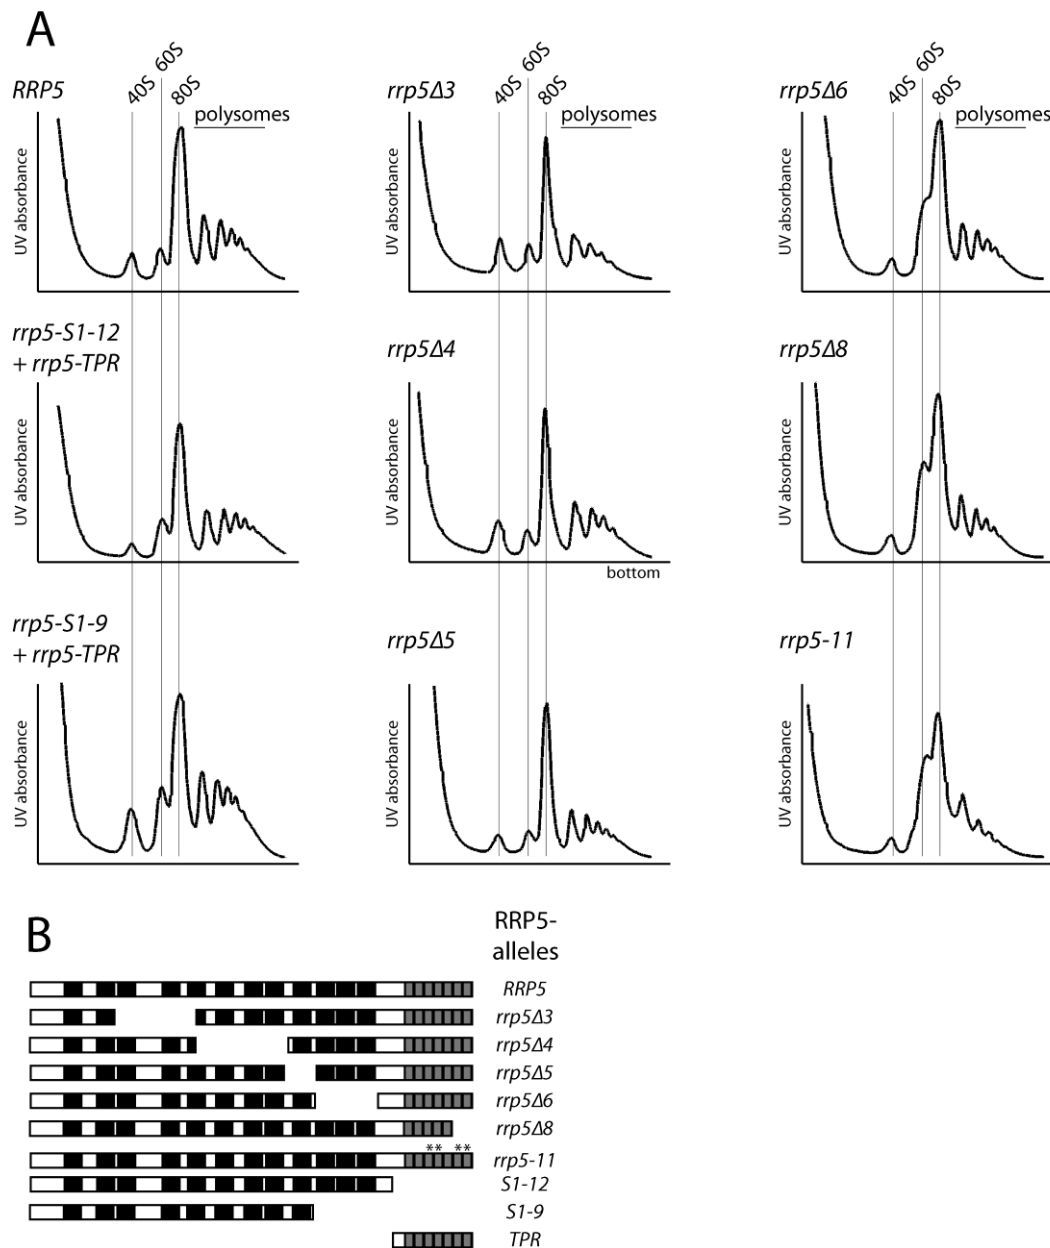

**Fig. S2 Polysome gradients of *RRP5* mutant strains**

A) An *RRP5* deletion strain (Y3762) was complemented with the indicated *RRP5* alleles (see panel B) expressed from the respective pJV314-ProtA plasmids (see Fig. S4) and grown in YPD at 30°C to OD 0.5 –0.8. Corresponding cell lysates were applied to 10-50% sucrose gradients, centrifuged for 16h at 27 000rpm and UV profiles were recorded at 254. The peaks of free 40S and 60S ribosomal subunits, 80S monosomes and polysomes are indicated. B) Overview of the *rrp5* alleles analysed in (A) and schematic presentation of the corresponding protein variants. Black bars illustrate the S1 RNA binding motifs, grey bars the tetratricopeptide repeats, respectively (adapted from (7)). Point mutations in the temperature sensitive *rrp5-11* allele are indicated (\*).

## Figure S3

| name                   | TY    | genotype                                                                                                                         | origin                         |
|------------------------|-------|----------------------------------------------------------------------------------------------------------------------------------|--------------------------------|
| BSY420                 | 1     | mat A, ade2-1, can1-100, his3200, leu2-3,112, trp1-1, ura3-1                                                                     | sup. reference (2)             |
| BY4741                 | 206   | mat A, his31, leu20, met150, ura30                                                                                               | Euroscarf                      |
| BSY420 NOC1-TAP        | 483   | mat A, ade2-1, can1-100, his3200, leu2-3,112, trp1-1, ura3-1, noc1::NOC1-TAP-TRP1                                                | this study, derivate of TY1    |
| CG379                  | 543   | mat alpha, ade5-1, his7-2, leu2-3,-112, trp1-289, ura3-52                                                                        | sup. reference (3)             |
| CG379 NOC2-TAP         | 577   | mat alpha, ade5, his7-2, leu2-112, trp1-289, ura3-52, noc2::NOC2-TAP-TRP1                                                        | this study, derivate of TY543  |
| RRP5-TAP               | 615   | mat alpha, ADE2, ADE3, his3, leu2, trp1, ura3, rrp5::RRP5-TAP-TRP1                                                               | this study                     |
| RRP5 shuffle (YJV148)  | 616   | mat A, ade2, his3, leu2, trp1, ura3, rrp5::HIS3, pURA3 RRP5 (URA3)                                                               | sup. reference (4)             |
| NOC1-Shuffle           | 772   | mat alpha, ade2-1, can1-100, his3200, leu2-3,112, trp1-1, ura3-1, noc1::HIS3, YCplac33-pNOC1-NOC1 (URA3)                         | sup. reference (2)             |
| NOC2-Shuffle           | 773   | mat alpha, ade2-1, can1-100, his3200, leu2-3,112, trp1-1, ura3-1, noc2::HIS3, YCplac33-pNOC2-NOC2 (URA3)                         | sup. reference (2)             |
| pGAL-NOC1              | 775   | mat alpha, ade2-1, can1-100, his3200, leu2-3,112, trp1-1, ura3-1, noc1::HIS3, YCplac22-pGAL-NOC1 (TRP1)                          | this study, derivate of TY772  |
| CG379 UTP4-TAP         | 1540  | mat alpha, ade5-1, his7-2, leu2-3,-112, trp1-289, ura3-52, utp4::UTP4-TAP-URA3                                                   | this study, derivate of TY543  |
| CG379 NOG2-TAP         | 1965  | mat alpha, ade5-1, his7-2, leu2-3,-112, trp1-289, ura3-52, noq2::NOG2-TAP-URA3                                                   | this study, derivate of TY543  |
| pGAL-RRP5              | 2299  | mat A, ade2, his3, leu2, trp1, ura3, rrp5::HIS3, YCplac22-pGAL-RRP5 (TRP1)                                                       | this study, derivate of TY616  |
| pGAL-RRP5 NOC2-TAP     | 2301  | mat A, ade2, his3, leu2, trp1, ura3, rrp5::HIS3, noc2::NOC2-TAP-URA3, YCplac22-pGAL-RRP5 (TRP1)                                  | this study, derivate of TY2299 |
| RRP5 shuffle NOC1-TAP  | 2302  | mat A, ade2, his3, leu2, trp1, ura3, rrp5::HIS3, noc1::NOC1-TAP-TRP1, pURA3 RRP5 (URA3)                                          | this study, derivate of TY616  |
| RRP5 shuffle NOC2-TAP  | 2303  | mat A, ade2, his3, leu2, trp1, ura3, rrp5::HIS3, noc2::NOC2-TAP-TRP1, pURA3 RRP5 (URA3)                                          | this study, derivate of TY616  |
| pGAL-RRP5 NOC1-TAP     | 2343  | mat A, ade2, his3, leu2, trp1, ura3, rrp5::HIS3, noc1::NOC1-TAP-URA3, YCplac22-pGAL-RRP5 (TRP1)                                  | this study, derivate of TY2299 |
| NOC1-shuffle UTP22-TAP | 2417  | mat alpha, ade2-1, can1-100, his3200, leu2-3,112, trp1-1, ura3-1, noc1::HIS3, utp22::UTP22-TAP-kanMX, YCplac33-pNOC1-NOC1 (URA3) | this study, derivate of TY772  |
| pGAL-NOC1 UTP22-TAP    | 2418  | mat alpha, ade2-1, can1-100, his3200, leu2-3,112, trp1-1, ura3-1, noc1::HIS3, utp22::UTP22-TAP-kanMX, YCplac22-pGAL-NOC1 (TRP1)  | this study, derivate of TY775  |
| BY4741 Rpb2-TEV-ProtA  | 2424  | mat A, his31 leu20 met150 ura30 rpb2::RPB2-TEV-ProtA-kanMX6                                                                      | this study, derivate of TY206  |
| BY4741 A135-TEV-ProtA  | 2423  | mat A, his31 leu20 met150 ura30 rpa135::RPA135-TEV-ProtA-kanMX6                                                                  | this study, derivate of TY206  |
| NOC1-Shuffle RRP5-TAP  | 2499  | mat alpha, ade2-1, can1-100, his3200, leu2-3,112, trp1-1, ura3-1, noc1::HIS3, rrp5::RRP5-TAP-kanMX, YCplac33-pNOC1-NOC1 (URA3)   | this study, derivate of TY772  |
| NOC2-Shuffle RRP5-TAP  | 2500  | mat alpha, ade2-1, can1-100, his3200, leu2-3,112, trp1-1, ura3-1, noc2::HIS3, rrp5::RRP5-TAP-kanMX, YCplac33-pNOC2-NOC2 (URA3)   | this study, derivate of TY773  |
| pGAL-NOC1 RRP5-TAP     | 2501  | mat alpha, ade2-1, can1-100, his3200, leu2-3,112, trp1-1, ura3-1, noc1::HIS3, rrp5::RRP5-TAP-kanMX, YCplac22-pGAL-NOC1 (TRP1)    | this study, derivate of TY2499 |
| pGAL-NOC2 RRP5-TAP     | 2502  | mat alpha, ade2-1, can1-100, his3200, leu2-3,112, trp1-1, ura3-1, noc2::HIS3, rrp5::RRP5-TAP-kanMX, YCplac22-pGAL-NOC2 (TRP1)    | this study, derivate of TY2500 |
| Noc1-TAP               | Y3572 | Mat alpha, ADE2, ADE3, leu2, trp1, his3, ura3, noc1::NOC1-TAP-HIS3                                                               | This study                     |
| Noc1, Rrp5 shuffle     | Y3668 | Mat alpha, ade2, his3, leu2, trp1, ura3, noc1::HIS3, rrp5::HIS3, pURA3-RRP5, YCplac33-NOC1                                       | This study                     |
| Noc3, Rrp5 shuffle     | Y3715 | ade2, his3, leu2, trp1, ura3, noc3::HIS3, rrp5::HIS3, pURA3 RRP5, YCplac33 Noc3                                                  | This study                     |
| Noc1-TAP, Rrp5 shuffle | Y3716 | ade2, his3, leu2, trp1, ura3, rrp5::HIS3, noc1::NOC1-TAP-natNT2, pURA3-RRP5                                                      | This study                     |
| Rrp5 shuffle           | Y3762 | Mat alpha, ADE2, ADE3, LYS2, his3, leu2, trp1, ura3, rrp5::HIS3, pURA3-RRP5                                                      | This study                     |
| Noc2, Rrp5 shuffle     | Y4207 | MAT a, LYS2, ADE2, ADE3, ura3, his3, trp1, leu2, noc2::KanMX, rrp5::HIS3, pURA3-RRP5, pRS316-NOC2                                | This study                     |

**Fig. S3 Yeast strains used in this study**

# Figure S4

| name                                        | TK   | features                                                                                | origin                   | generation                                                                                                                                                                                                                              |
|---------------------------------------------|------|-----------------------------------------------------------------------------------------|--------------------------|-----------------------------------------------------------------------------------------------------------------------------------------------------------------------------------------------------------------------------------------|
| YCplac22GAL-NOc2                            | 11   | CEN4 ARS1 TRP1 pGAL-NOc2                                                                | this study               | yeast NOC2 was amplified by PCR using oligos o56 and o57 and cloned into V48 via Sall/PstI                                                                                                                                              |
| YCplac22GAL-NOc1                            | 37   | CEN4 ARS1 TRP1 pGAL-NOc1                                                                | this study               | yeast NOC1 was amplified by PCR using oligos o34 and o39 and cloned into V48 via XbaI/HindIII                                                                                                                                           |
| pUCDM                                       | 1127 | Ori-R6Kg ChR loxP p10 polh                                                              | sup. reference (5)       |                                                                                                                                                                                                                                         |
| pSPL                                        | 1129 | Ori-R6Kg SpecR loxP p10 polh                                                            | sup. reference (6)       |                                                                                                                                                                                                                                         |
| pFL                                         | 1130 | Ori-ColE1 AmpR GentR loxP Tn7L/R p10 polh                                               | sup. reference (6)       |                                                                                                                                                                                                                                         |
| pSPL-6xHis                                  | 1211 | Ori-R6Kg SpecR loxP p10 polh                                                            | this study               | Primer annealing of oligos o1966 and o1967, cloning into TK1129 via BamHI/Sall                                                                                                                                                          |
| pFL-Flag-TEV                                | 1212 | Ori-ColE1 AmpR GentR loxP Tn7L/R p10 polh                                               | this study               | Primer annealing of oligos o1964 and o1965, cloning into TK1130 via BamHI/Sall                                                                                                                                                          |
| pFL-Flag-TEV-NOc2                           | 1213 | Ori-ColE1 AmpR GentR loxP Tn7L/R p10 polh-NOc2                                          | this study               | yeast NOC2 was amplified by PCR using oligos o1968 and o1969 and cloned into TK1212 via Sall/PstI                                                                                                                                       |
| pUCDM-NOc1                                  | 1230 | Ori-R6Kg ChR loxP p10 polh-NOc1                                                         | this study               | yeast NOC1 was amplified by PCR using oligos o1974 and o1975 and cloned into TK1127 via Sall/XbaI                                                                                                                                       |
| pFL-Flag-TEV-NOc2-pUCDM-NOc1                | 1232 | Ori-ColE1 Ori-R6Kg AmpR GentR ChR loxP Tn7L/R p10 polh-NOc2, polh-NOc1                  | this study               | in vitro cre-lox recombination of plasmid TK1230 and TK1213                                                                                                                                                                             |
| pSPL-6xHis-Rrp5                             | 1259 | Ori-R6Kg SpecR loxP p10 polh-RRP5                                                       | this study               | yeast RRP5 was amplified by PCR using oligos o1972 and o1973 and cloned into TK1211 via BamHI/PstI                                                                                                                                      |
| pFL-Flag-TEV-NOc1                           | 1476 | Ori-ColE1 AmpR GentR loxP Tn7L/R p10 polh-NOc1                                          | this study               | yeast NOC1 subcloned from TK1230 into TK1212 via Sall/XbaI                                                                                                                                                                              |
| pMA-RQ-3xHA-Thrombin                        | 1500 | Ori-ColE1 AmpR                                                                          | Geneart                  | gene synthesis by Geneart                                                                                                                                                                                                               |
| pSPL-3xHA-ThrombinSS                        | 1502 | Ori-R6Kg SpecR loxP p10 polh                                                            | this study               | sequence encoding START-codon-3xHA-tag-Thrombin-recognition-site subcloned from TK1500 (BgIII/PstI) in TK1129 (BamHI/PstI)                                                                                                              |
| pSPL-3xHA-Rrp5                              | 1503 | Ori-R6Kg SpecR loxP p10 polh-RRP5                                                       | this study               | yeast RRP5 subcloned from TK1259 into TK1502 via BamHI/PstI                                                                                                                                                                             |
| pFL-Flag-TEV-NOc2-pSPL-3xHA-Rrp5-pUCDM-NOc1 | 1504 | Ori-ColE1 Ori-R6Kg AmpR GentR ChR SpecR loxP Tn7L/R p10 polh-NOc1, polh-NOc2, polh-RRP5 | this study               | in vitro cre-lox recombination of plasmid TK1230, TK1213 and TK1503                                                                                                                                                                     |
| YCplac22GAL-RRP5                            | 1517 | pGAL-RRP5 ARS1 CEN4 TRP1                                                                | this study               | yeast RRP5 subcloned from TK1503 into V48 via BamHI/PstI                                                                                                                                                                                |
| pFL-Flag-TEV-NOc1-pSPL-3xHA-RRP5            | 1658 | Ori-ColE1 Ori-R6Kg AmpR GentR SpecR loxP Tn7L/R p10 polh-NOc1, polh-RRP5                | this study               | in vitro cre-lox recombination of plasmid TK1476 and TK1503                                                                                                                                                                             |
| pFL-Flag-TEV-NOc2-pSPL-3xHA-RRP5            | 1677 | Ori-ColE1 Ori-R6Kg AmpR GentR SpecR loxP Tn7L/R p10 polh-NOc2, polh-RRP5                | this study               | in vitro cre-lox recombination of plasmid TK1212 and TK1503                                                                                                                                                                             |
| pSPL-3xHA-rrp5-S1-9+N                       | 1698 | Ori-R6Kg SpecR loxP p10 polh-rrp5-S1-9                                                  | this study               | truncated allele of yeast RRP5 was generated by PCR using oligos o1972 and o2901 and cloned into TK1502 via BamHI/PstI                                                                                                                  |
| pSPL-3xHA-rrp5-S1-6+N                       | 1699 | Ori-R6Kg SpecR loxP p10 polh-rrp5-S1-6                                                  | this study               | truncated allele of yeast RRP5 was generated by PCR using oligos o1972 and o2900 and cloned into TK1502 via BamHI/PstI                                                                                                                  |
| pSPL-3xHA-rrp5-S1-6                         | 1700 | Ori-R6Kg SpecR loxP p10 polh-rrp5-S1-6-dN                                               | this study               | truncated allele of yeast RRP5 was generated by PCR using oligos o2897 and o2900 and cloned into TK1502 via BamHI/PstI                                                                                                                  |
| pSPL-3xHA-rrp5-S10-TPR                      | 1703 | Ori-R6Kg SpecR loxP p10 polh-rrp5-S10-TPR                                               | this study               | truncated allele of yeast RRP5 was generated by PCR using oligos o2905 and o1973 and cloned into TK1502 via BamHI/PstI                                                                                                                  |
| pSPL-3xHA-rrp5-S1-9+N-pFL-Flag-NOc1         | 1727 | Ori-ColE1 Ori-R6Kg AmpR GentR SpecR loxP Tn7L/R p10 polh-NOc1, polh-rrp5-S1-9           | this study               | in vitro cre-lox recombination of plasmid TK1476 and TK1698                                                                                                                                                                             |
| pSPL-3xHA-rrp5-S1-6+N-pFL-Flag-NOc1         | 1728 | Ori-ColE1 Ori-R6Kg AmpR GentR SpecR loxP Tn7L/R p10 polh-NOc1, polh-rrp5-S1-6           | this study               | in vitro cre-lox recombination of plasmid TK1476 and TK1699                                                                                                                                                                             |
| pSPL-3xHA-rrp5-S1-6-pFL-Flag-NOc1           | 1729 | Ori-ColE1 Ori-R6Kg AmpR GentR SpecR loxP Tn7L/R p10 polh-NOc1, polh-rrp5-S1-6-dN        | this study               | in vitro cre-lox recombination of plasmid TK1476 and TK1700                                                                                                                                                                             |
| pSPL-3xHA-rrp5-S10-TPR-pFL-Flag-NOc1        | 1732 | Ori-ColE1 Ori-R6Kg AmpR GentR SpecR loxP Tn7L/R p10 polh-NOc1, polh-rrp5-S10-TPR        | this study               | in vitro cre-lox recombination of plasmid TK1476 and TK1703                                                                                                                                                                             |
| YCplac22GAL                                 | V48  | CEN4 ARS1 TRP1 pGAL1/10                                                                 | gift from Markus Künzler | GAL1/10 sequence cloned into YCplac22 via BamHI/EcoRI                                                                                                                                                                                   |
| pURA3-RRP5                                  |      | CEN6 ARSH4 URA3 pRRP5-RRP5                                                              | sup. reference (4)       |                                                                                                                                                                                                                                         |
| pUN100 NOc2                                 |      | CEN4 ARS1 LEU2 pNOC2-NOc2                                                               | sup. reference (2)       |                                                                                                                                                                                                                                         |
| pRS315 noc2-1                               |      | CEN6 ARSH4 LEU2 pNOC2-noc2-1                                                            | this study               | yeast noc2-1 allele including promoter (-450bp) and terminator (+350bp) region was amplified by PCR and cloned into pRS315 via SacI/XhoI                                                                                                |
| pNOPPA1L NOC3                               |      | CEN6 ARSH4 LEU2 pNOP1-PA-NOc3                                                           | this study               | internal BglII fragment of non complementing pNOPPA1L-NOc3 (Milkereit et al., 2001) was replaced by BglII Fragment of YEP13 NOC3 (Bafler et al., 2006)                                                                                  |
| pNOPPA1L noc3-1                             |      | CEN6 ARSH4 LEU2 pNOP1-PA-noc3-1                                                         | sup. reference (2)       |                                                                                                                                                                                                                                         |
| pNOPPA1L noc3-2                             |      | CEN6 ARSH4 LEU2 pNOP1-PA-noc3-2                                                         | O.Gadal unpublished      | generated analogously as pNOPPA1L-noc3-1 (Milkereit et al., 2001)                                                                                                                                                                       |
| pNOPPA1L NOC1                               |      | CEN6 ARSH4 LEU2 pNOP1-PA-NOc1                                                           | sup. reference (2)       |                                                                                                                                                                                                                                         |
| pNOPPA1L noc1-1                             |      | CEN6 ARSH4 LEU2 pNOP1-PA-noc1-1                                                         | sup. reference (2)       |                                                                                                                                                                                                                                         |
| pNOPPA1L noc1-3                             |      | CEN6 ARSH4 LEU2 pNOP1-PA-noc1-3                                                         | O. Gadal unpublished     | generated analogously as pNOPPA1L-noc1-1 (Milkereit et al., 2001)                                                                                                                                                                       |
| pJV314 protA RRP5                           |      | CEN6 ARSH4 TRP1 pRRP5-PA-RRP5                                                           | sup. reference (4)       |                                                                                                                                                                                                                                         |
| pJV314 protA rrp5-11                        |      | CEN6 ARSH4 TRP1 pRRP5-PA-rrp5-11                                                        | sup. reference (7)       |                                                                                                                                                                                                                                         |
| pJV314 protA rrp5Δ3                         |      | CEN6 ARSH4 TRP1 pRRP5-PA-rrp5-Δ3                                                        | sup. reference (7)       |                                                                                                                                                                                                                                         |
| pJV314 protA rrp5Δ4                         |      | CEN6 ARSH4 TRP1 pRRP5-PA-rrp5-Δ4                                                        | sup. reference (7)       |                                                                                                                                                                                                                                         |
| pJV314 protA rrp5Δ5                         |      | CEN6 ARSH4 TRP1 pRRP5-PA-rrp5-Δ5                                                        | sup. reference (7)       |                                                                                                                                                                                                                                         |
| pJV314 protA rrp5Δ6                         |      | CEN6 ARSH4 TRP1 pRRP5-PA-rrp5-Δ6                                                        | sup. reference (7)       |                                                                                                                                                                                                                                         |
| pJV314 protA rrp5Δ8                         |      | CEN6 ARSH4 TRP1 pRRP5-PA-rrp5-Δ8                                                        | sup. reference (7)       |                                                                                                                                                                                                                                         |
| pRS315 RRP5-GFP                             |      | CEN6 ARSH4 LEU2 pRRP5-RRP5-GFP                                                          | this study               | yeast RRP5 promoter was amplified by PCR and cloned into pRS315 Rpl25-GFP (Gadal et al., 2001) via NotI/PstI; subsequently, yeast RRP5 without stop codon was amplified by PCR and inserted via PstI/BamHI                              |
| pRS315 rrp5 S10-TPR-GFP                     |      | CEN6 ARSH4 LEU2 pRRP5-rrp5-S10-TPR-GFP                                                  | this study               | yeast RRP5 promoter was amplified by PCR and cloned into pRS315 Rpl25-GFP (Gadal et al., 2001) via NotI/PstI; subsequently, yeast rrp5-S10-TPR without stop codon was amplified by PCR adding a start codon and inserted via PstI/BamHI |
| pRS314 rrp5 S1-9-GFP                        |      | CEN6 ARSH4 TRP1 pRRP5-rrp5-S1-9-GFP                                                     | this study               | yeast RRP5 promoter was amplified by PCR and cloned into pRS314 Rpl25-GFP (Gadal et al., 2001) via NotI/PstI; subsequently, yeast rrp5-S1-9 codon was amplified by PCR and inserted via PstI/BamHI                                      |
| YCplac33 NOC1                               |      | CEN4 ARS1 URA3 pNOC1-NOc1                                                               | sup. reference (2)       |                                                                                                                                                                                                                                         |
| pRS316 NOC2                                 |      | CEN6 ARSH4 URA3 pNOC2-NOc2                                                              | O.Gadal unpublished      | yeast NOC2 including promoter and terminator region was amplified by PCR and cloned into pRS316 via PstI/SacI                                                                                                                           |
| YCplac33 NOc3                               |      | CEN4 ARS1 URA3 pNOC3-NOc3                                                               | sup. reference (2)       |                                                                                                                                                                                                                                         |

Tn7L/R: Tn7 transposition sequences; p10, polh: baculoviral promoters; loxP: Cre-lox recombination site; Ori-ColE1, Ori-R6Kg: bacterial replication origins; AmpR, GentR, ChR, SpecR: resistance marker for Ampicillin, Gentamycin, Chloramphenicol, Spectinomycin

**Fig. S4 Plasmids used in this study**

## Figure S5

### Primer for tagging

| oligo | sequence                                                                          |
|-------|-----------------------------------------------------------------------------------|
| 177   | ATCTGCCGACGATTGCTCAATATTTAGATCAAGATTCAGACTCCATGGAAAAGAGAAG                        |
| 178   | TAA TTTACAACACCGAAGTGTGTTAGTTAATGTATTA TTTTTCGACTCACTATAGGG                       |
| 287   | GCTACTGAGTATGTCGCTAGCCATGAA TCTCAAAAAGCAGACGAACTGCTGCAGGTCGAC                     |
| 288   | AACTTAGCCATTTATATTACTTTACAGTTAAAAATCCATCAGGAAATCGATGAATTCGAGCTCG                  |
| 621   | AAGTATGATGACAAACGAAGATGTTGAAA TGTCAGACGCT TCCA TGAAAAGAGAAG                       |
| 622   | CTATTGAATCAAGACAAAAATCAAA TCTGTGCTGAGTTGTACGACTCACTATAGGG                         |
| 1813  | ACTTTTCACTCCAAACAAAAGGCGTTTATCAACCAAAGTTAGTGTITTTCCATGGAAAAGAGAAG                 |
| 1814  | GCCTTTTAAATAGCATCTCTCTATTCTCCGGTATGTGACTTAAATTAATACGACTCACTATAGGG                 |
| 2161  | AGGAAGGGGAAAGAAAACCAAAGAGAAGAAAGAGTTGAGAAGACGGCATCCA TGAAAAGAGAAG                 |
| 2162  | TCACCTGTAA TCTTAAATTAATATTATACCCGGTGTCCGTTTTTACCTTACGACTCACTATAGGG                |
| 2261  | GAGATGCTGCA TCCGGAA TGACATGGTTA TAAATTTGAGACAGATTCCA TGAAAAGAGAAG                 |
| 2262  | TTTAA TATATACAGATACTTCTAAAAGTTATGATTTTGTGTTTATTTACGACTCACTATAGGG                  |
| 2952  | ATGAGATGCTGCA TCCGGAA TGACATGGTTA TAAATTTGAGACAGATCGTACGCTGCAGGTCGAC              |
| 2953  | GCTGCTTAA TTTTAA TATATACAGATACTTCTAAAAGTTATGATTTTGTGTTTATTTCA TGAAATTCGAGCTCG     |
| 3179  | GATGGTACCCCTGAGCTATCCGCAATGGGTA TAAAGTTGCGTTA TAA TGTAGAGCCCAAACGTACGCTGCAGGTCGAC |
| 3180  | CTACCCGCGCCAAACCTTCA TTTACCA TTTCAATTTGAAAAGAGGGTATTTCTATCGATGAATTCGAGCTCG        |
| 3225  | ATGAACATACACCAAGTTTATATACCGATCGTTCGAGAGATTTT CGT ACG CTG CAG GTC GAC              |
| 3226  | AA TGTTTTTTATTTTACTTCTTAGAGTTACAACATTTTC ATC GAT GAA TTC GAG CTC G                |

### Primer for cloning

| oligo | sequence                                                                   |
|-------|----------------------------------------------------------------------------|
| 34    | TTTTTAAAGCTTTTGTGCTACAAA TGTGCCTATAT                                       |
| 39    | TTTTTTCTAGAA TGAGTGAA CAACCGCAATCCGC                                       |
| 56    | TTTTTCTGACGAAATCATATATCTTGTACTAAATTTGCG                                    |
| 57    | TTTTTGTGACATGGGTAAGTTTCTAAATCGACCAAG                                       |
| 1964  | TCGACGAGGGATCCGGCGCCCTGAAAA TACAGGTTTTCCAGGATCTTATCGTGTCTATCCCTGTAATCCATA  |
| 1965  | GATCTATGGATTACAAGGATGACGACGATAAGATCCCTGGAAAACCTGTATTTTTCAGGGCGCCGGATCCCTCG |
| 1966  | GATCTATGCA TCAACATCAACATCAGATTACGGATCCCTCG                                 |
| 1967  | TCGACGAGGGATCCGTAATCGTGA TGGTGA TGGTGA TGCATA                              |
| 1968  | TTTTTGTGACATGGGTAAGTTTCTAAATC                                              |
| 1969  | TTTTTCTGAGTTAAGCGCTGACATTTCAA                                              |
| 1972  | TTTTTGGATCCATGGTAGCTTCCACCAAAG                                             |
| 1973  | TTTTTCTGAGTTATTCGTCTGTTTTGAG                                               |
| 1974  | TTTTTGTGACATGAGTGAGAA CAACGGCAA                                            |
| 1975  | TTTTTCTAGATTAGCTGAATCTGTATCTA                                              |
| 2897  | TTTTTTT GGATCC ATG CTAATGAAACATGCAACTTTAAAACG                              |
| 2900  | TTTTTTT CTGCAG TTA TTAGCGTCTTAA TCAGAGAAC                                  |
| 2901  | TTTTTTT CTGCAG TTA AACTTTAATTTGGACATA TTTATGTC                             |
| 2905  | TTTTTTT GGATCC ATG TCCAAATTAAGTTGGTATGAA                                   |
| 2906  | TTTTTTT GGATCC ATG ACTGTGGATCAACTGGAAAAG                                   |

### Primer for qPCR:

| oligo | sequence                      | amplicon |
|-------|-------------------------------|----------|
| 613   | CATGATCAGATGGGGCTTGA          | 9        |
| 614   | ACCGTGTGATGCGACTCTGT          |          |
| 710   | TGGAGCAAAGAAATCAACCGC         | 7        |
| 711   | CCGCTGGA TTAGGCTGAAC          |          |
| 712   | GAGTCTTGTGGCTTGGC             | 3        |
| 713   | AA TACTGATGCCCCGACC           |          |
| 920   | GCCATATCTACCAAGAAAGCAC        |          |
| 921   | GATTGCAGCACCTGAGTTTCG         | 8        |
| 969   | TCATGGAGTACAAGTGTGAGGA        |          |
| 970   | TAACGAACGACAAGCCTACTC         | 1        |
| 2011  | CTTGGATGTGGTAGCCGTTT          |          |
| 2012  | TCGACCCCTTGGAAAGAGATG         | 2        |
| 2429  | AAAGAAGACCCCTGTGAGCTTGA       |          |
| 2430  | GTA TTTCACTGGCGCGAA           | 6        |
| 2481  | GGTGGTAAATCCATCTAAAGCTAAATATT |          |
| 2482  | CACGTACTTTTCACTCTTTTCAA       | 5        |
| 2864  | GCATGCCTGTTGAGCGTC            |          |
| 2865  | CGACCGTACTTGATTA TACC         | 4        |
|       |                               |          |

### Probes for Northern Blot:

| oligo | sequence                |
|-------|-------------------------|
| 202   | CCAACTGTGACTGACCTT      |
| 205   | CATGGCTTAATCTTTGAGAC    |
| 207   | TGTTACCTCTGGGCC         |
| 209   | TTTCGCTGCTTCTCATC       |
| 210   | GGCCAGCAATTTCAAGTTA     |
| 211   | GAACATGTTCGCCTAGA       |
| 212   | CTCCGCTTATGATATGC       |
| 1819  | GTAAAAGCTCTCA TGTCTTGGC |
| 2474  | TAACTACAGTTGATCGG       |

**Fig. S5 Oligonucleotides used in this study**

Figure S6

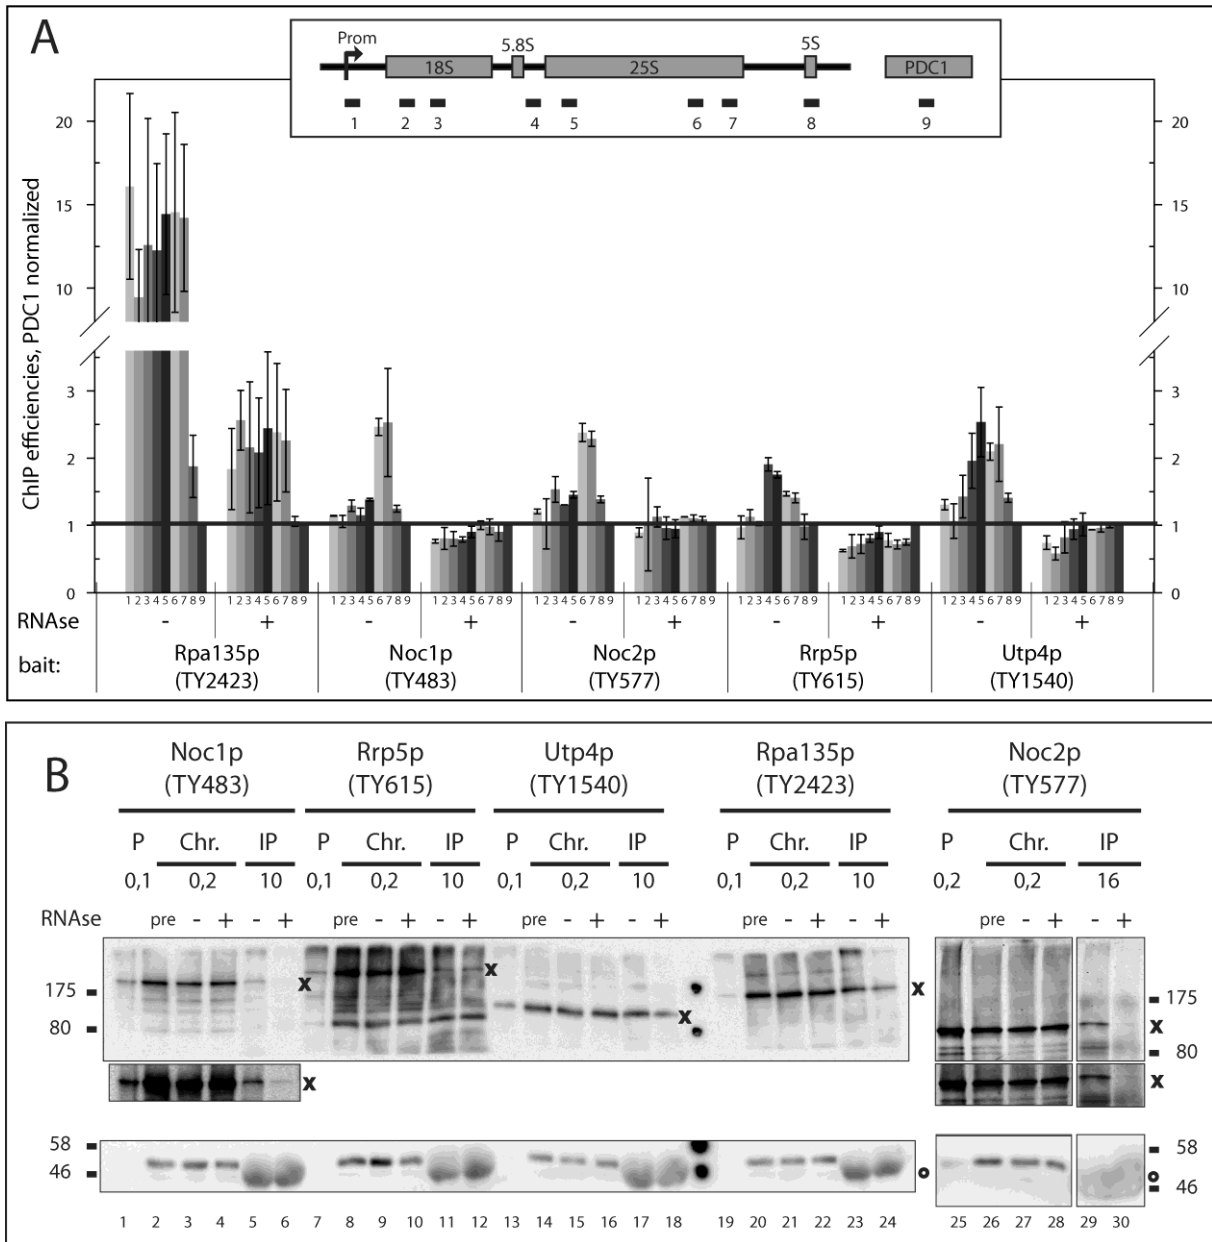

**Fig. S6: Comparison of co-transcriptional recruitment of ribosome biogenesis factors and Pol-I in the presence and absence of RNase treatment using ChIP**

A) ChIP experiments using the same primer pairs as described in Figure 7 with and without RNase A and T1 treatment before immunoprecipitation were performed as described in the supplementary methods. The amounts of specific DNA fragments present in the input and retained on the beads were determined by qPCR. In each experiment the precipitation efficiencies (% IP (rDNA)) for the respective amplified DNA regions were calculated and normalised to the PDC1 precipitation efficiencies (% IP (rDNA) / % IP (PDC1)). The graph shows the average of two biological replicates including standard deviations. A black line depicts the internal background as a result of the normalisation to the precipitated PDC1 DNA.

B) Yield of immunoprecipitated Pol-I and biogenesis factors in ChIP experiments without and with RNase treatment using Western blotting. Relative amounts to the chromatin input per IP of the insoluble material after sonication (P), the soluble chromatin fraction (Chr) without (pre) or after incubation at 25°C with (+) or without (-) RNases, and the precipitated material (IP) from RNase treated (+) or untreated (-) chromatin are indicated. Upper panel: The TAP-tag fusion proteins were detected with PAP detection reagent (Sigma, P1291) (left) or with anti-ProtA antibody (P3775, Sigma-Aldrich) and a fluorophor coupled secondary antibody (LICOR, 926-32211) (right; TY577). The bands of the TAP-tagged proteins are marked (x). Insets show a digitally enhanced view of the same blot. Lower panel: Tubulin was detected as a loading control. Rabbit IgG chains detected in the IP lanes by cross reaction of the secondary antibody are indicated (°).

#### Comments:

In two independent experiments, a significant amount of Pol-I was still associated with the Pol-I promoter and the 35S rDNA after RNase treatment of the chromatin fraction. In contrast, neither Noc1p, Noc2p, Rrp5p nor Utp4p were more enriched at the Pol-I-transcribed rDNA locus than at the 5S or PDC1 genes (background control) after RNase treatment, indicating that their rDNA association is mediated through interaction with RNA. Surprisingly, the absolute amount of rDNA associated Pol-I dropped also after RNase treatment. This could be due to formation of Pol-I - rDNA aggregates after RNase treatment, which are not accessible anymore for immunoprecipitation. We note that for unknown reasons also purification efficiencies of tagged Noc1p and Noc2p were reproducibly reduced after RNase treatment of the chromatin fraction.

Proteome analysis of Pol-I associated chromatin (according to Fig. 6), which was isolated including or not treatment with RNase, supported the assumption that a subgroup of ribosome biogenesis factors is associated with rDNA chromatin in an RNA dependent manner. The average iTRAQ ratio for Pol-I peptides was 1.13, for putative contaminants like translation factors, ribosomal proteins or heat shock proteins 1.23, and for peptides of SSU processome components and early LSU biogenesis factors 1.39, when Pol-I associated chromatin from mock treated and RNase treated samples was compared.



Figure S7

A

Rrp5p Depletion, Noc1p-TAP

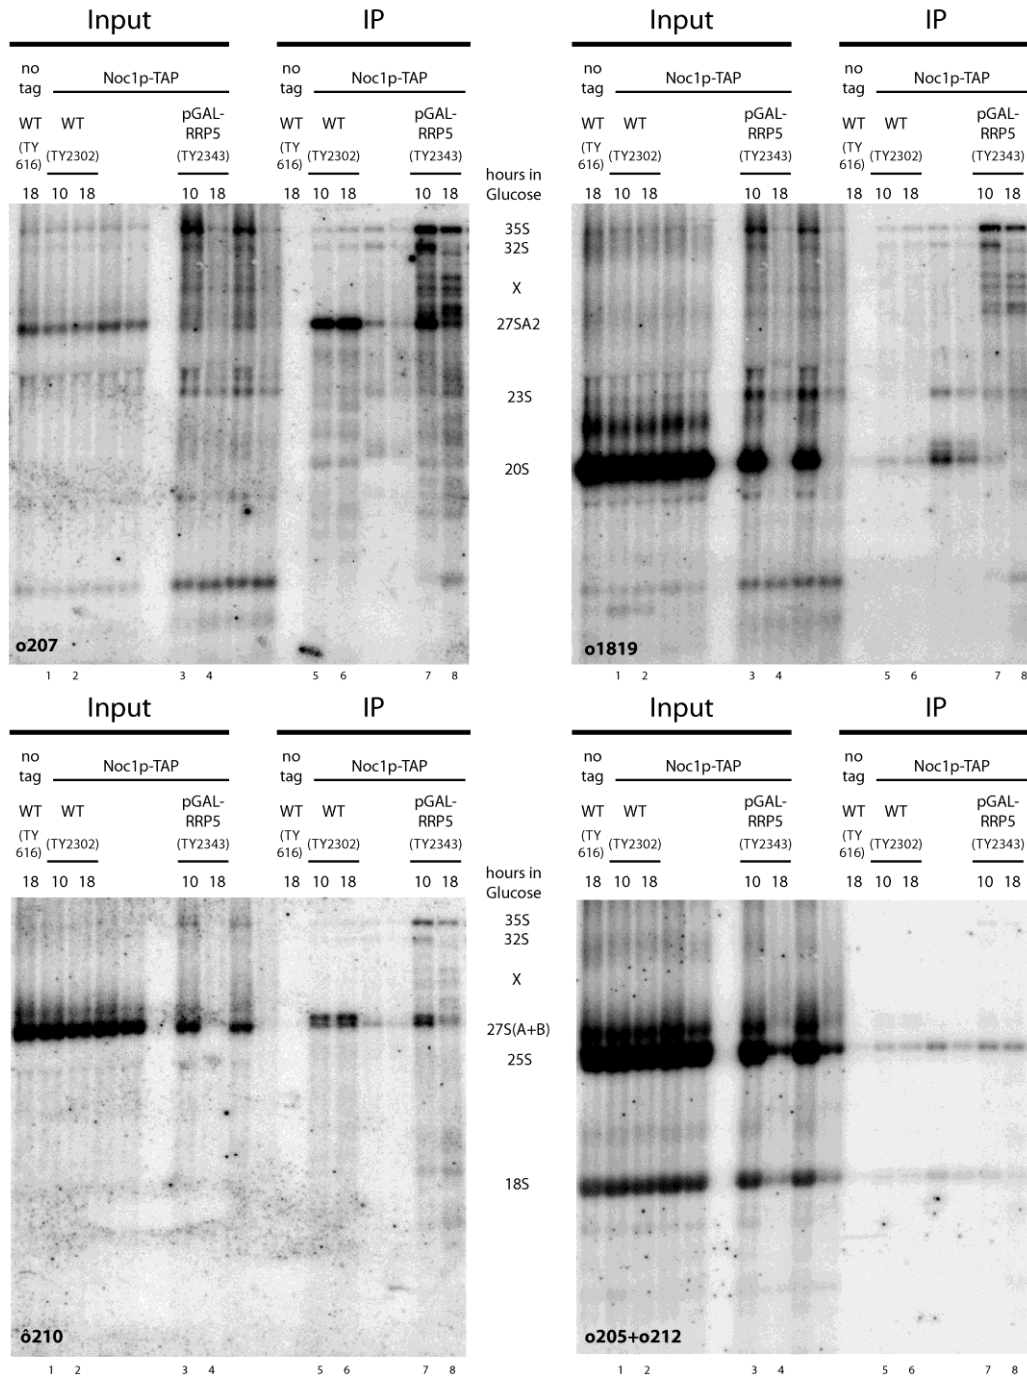

Figure S7

**B** Rrp5p Depletion, Noc2p-TAP

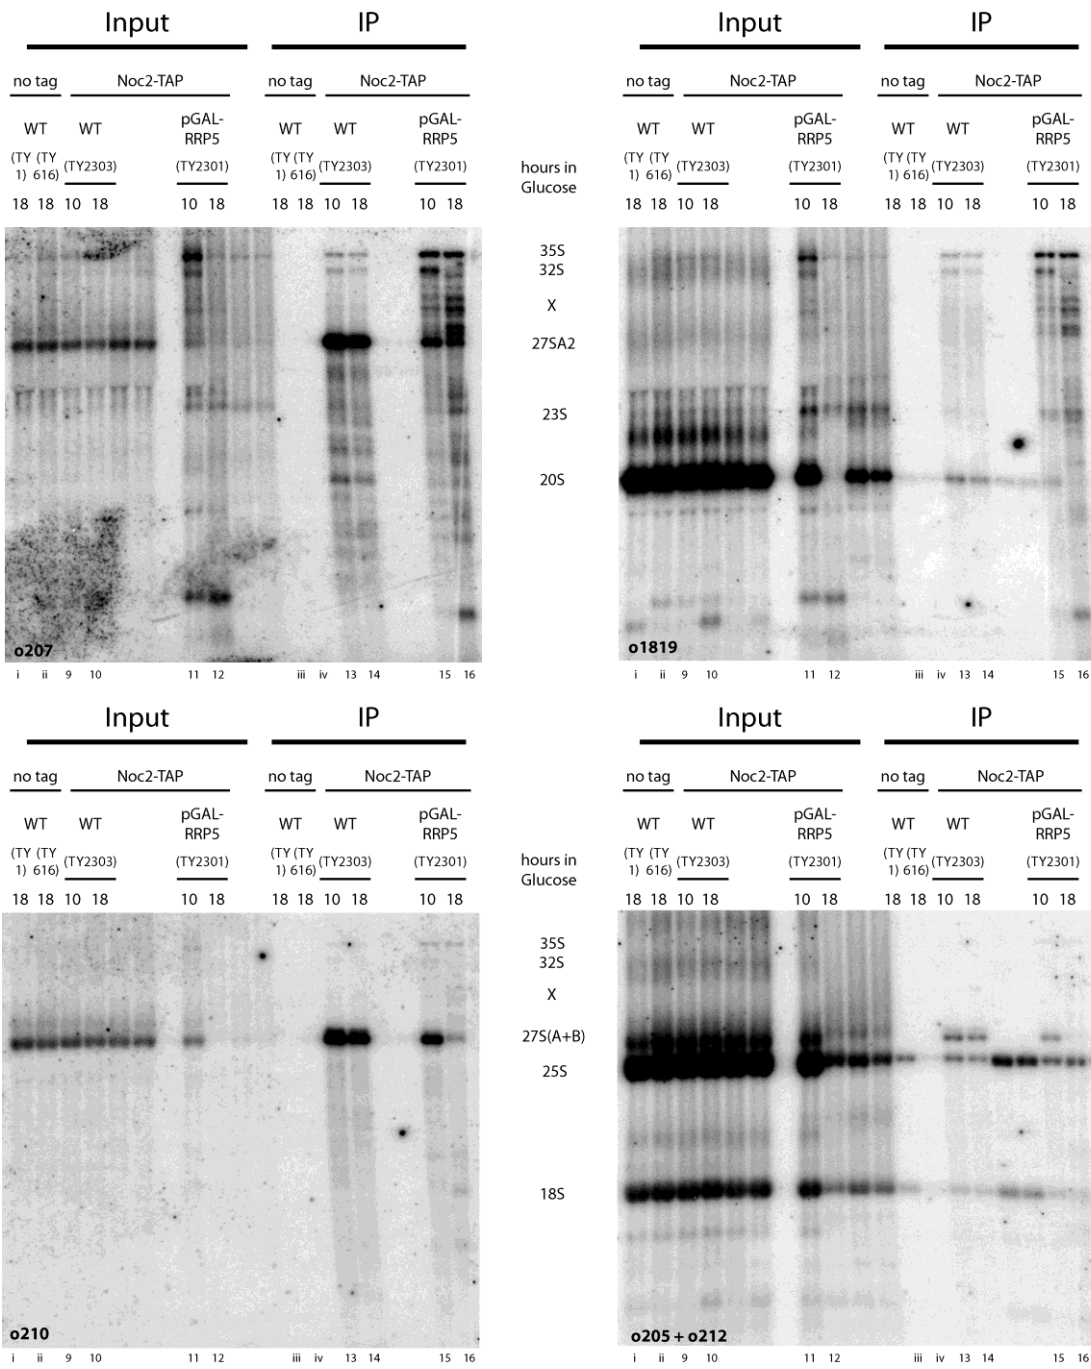

Figure S7

C Noc2p Depletion, Rrp5p-TAP

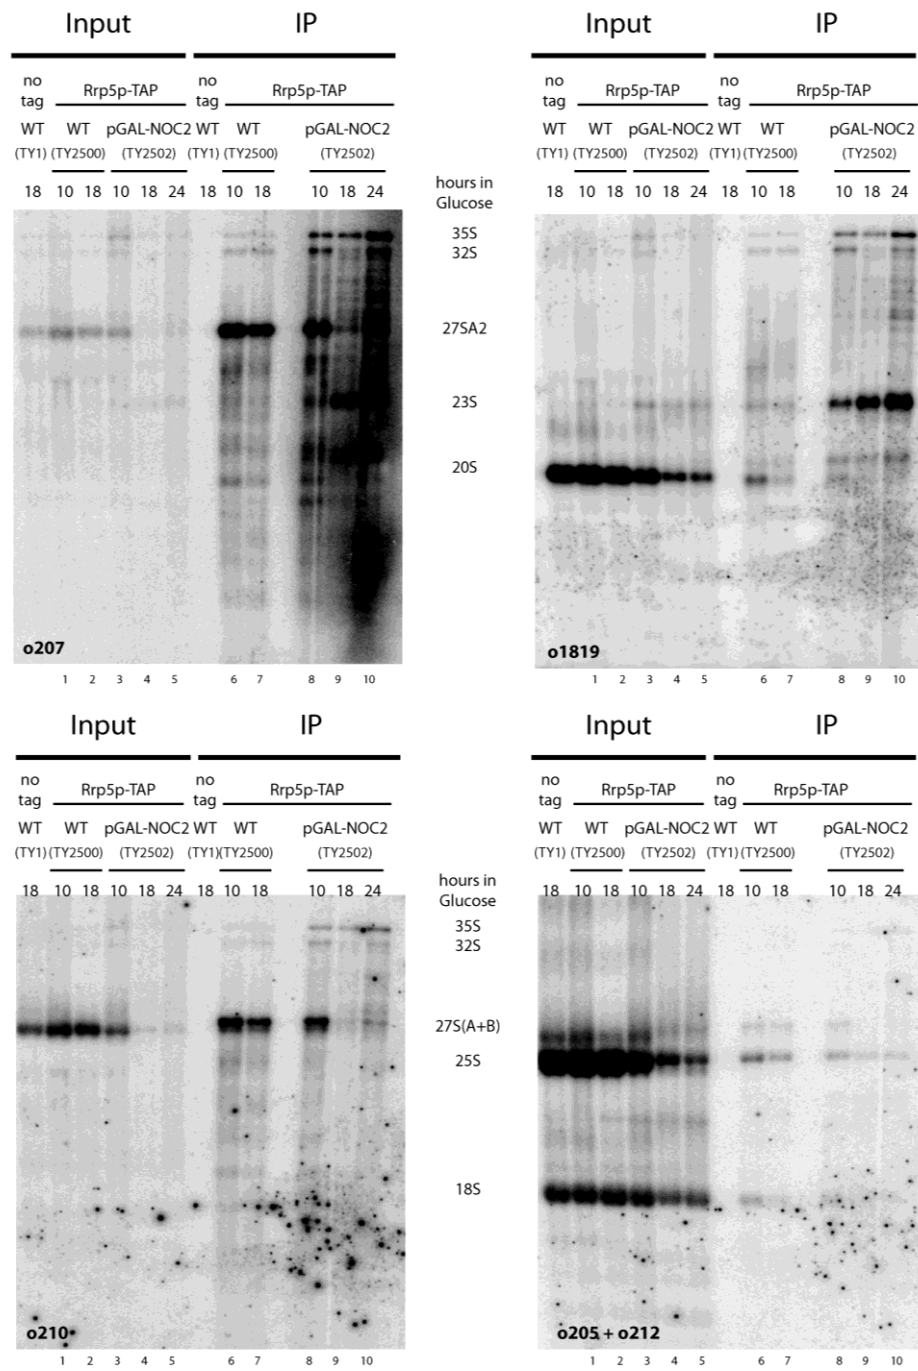

Figure S7

D Noc1p Depletion, Rrp5p-TAP

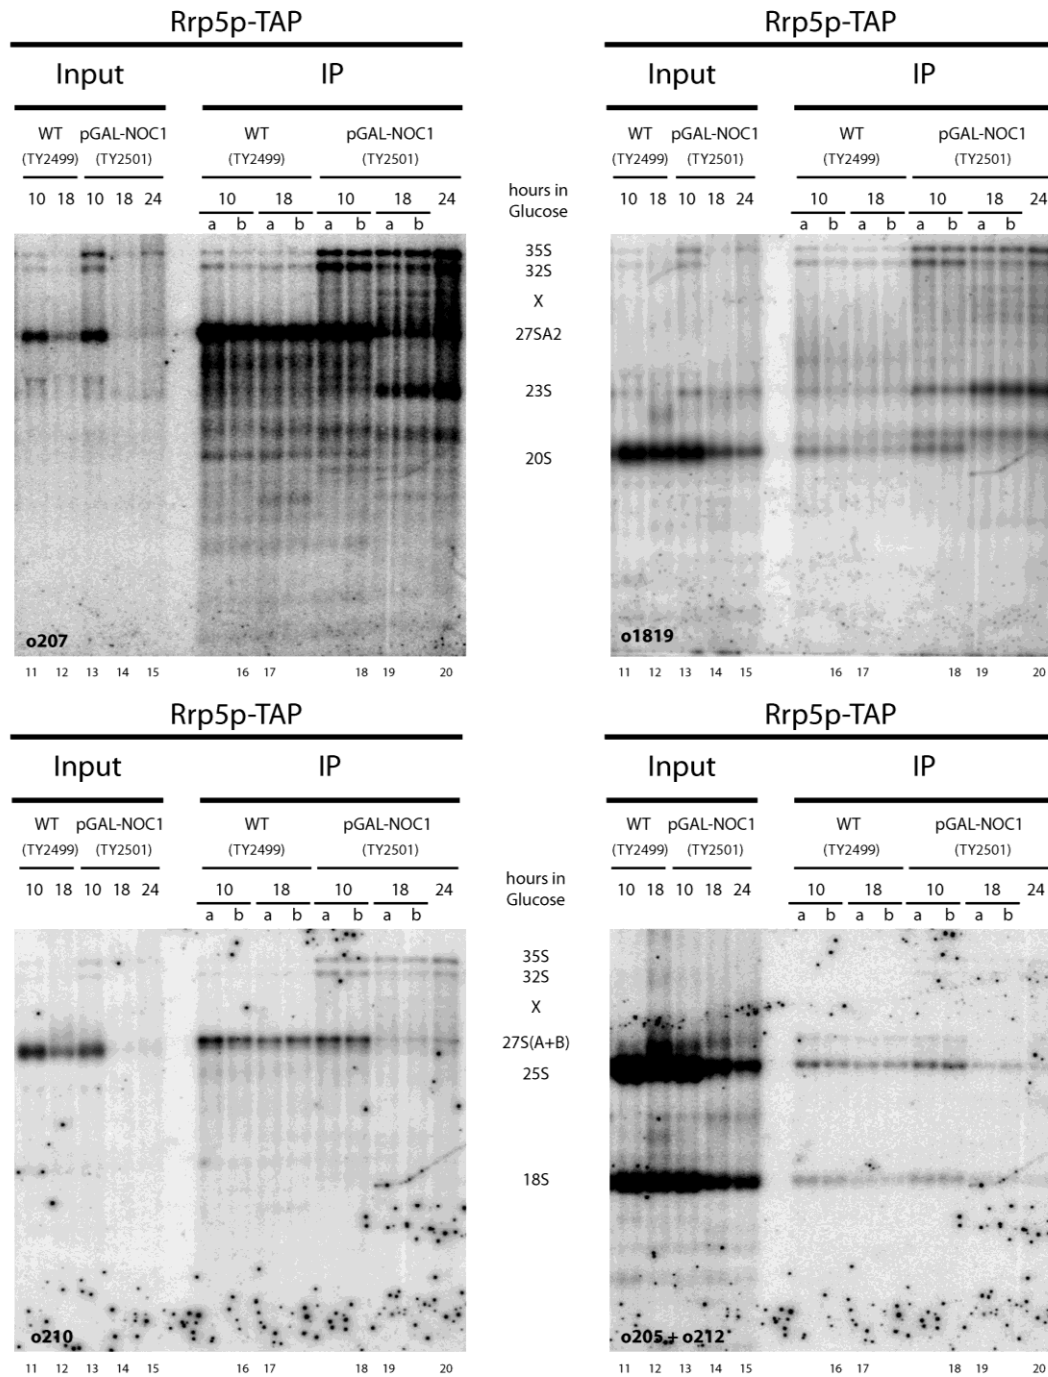

Figure S7

**E** Noc1p Depletion, Utp22p-TAP

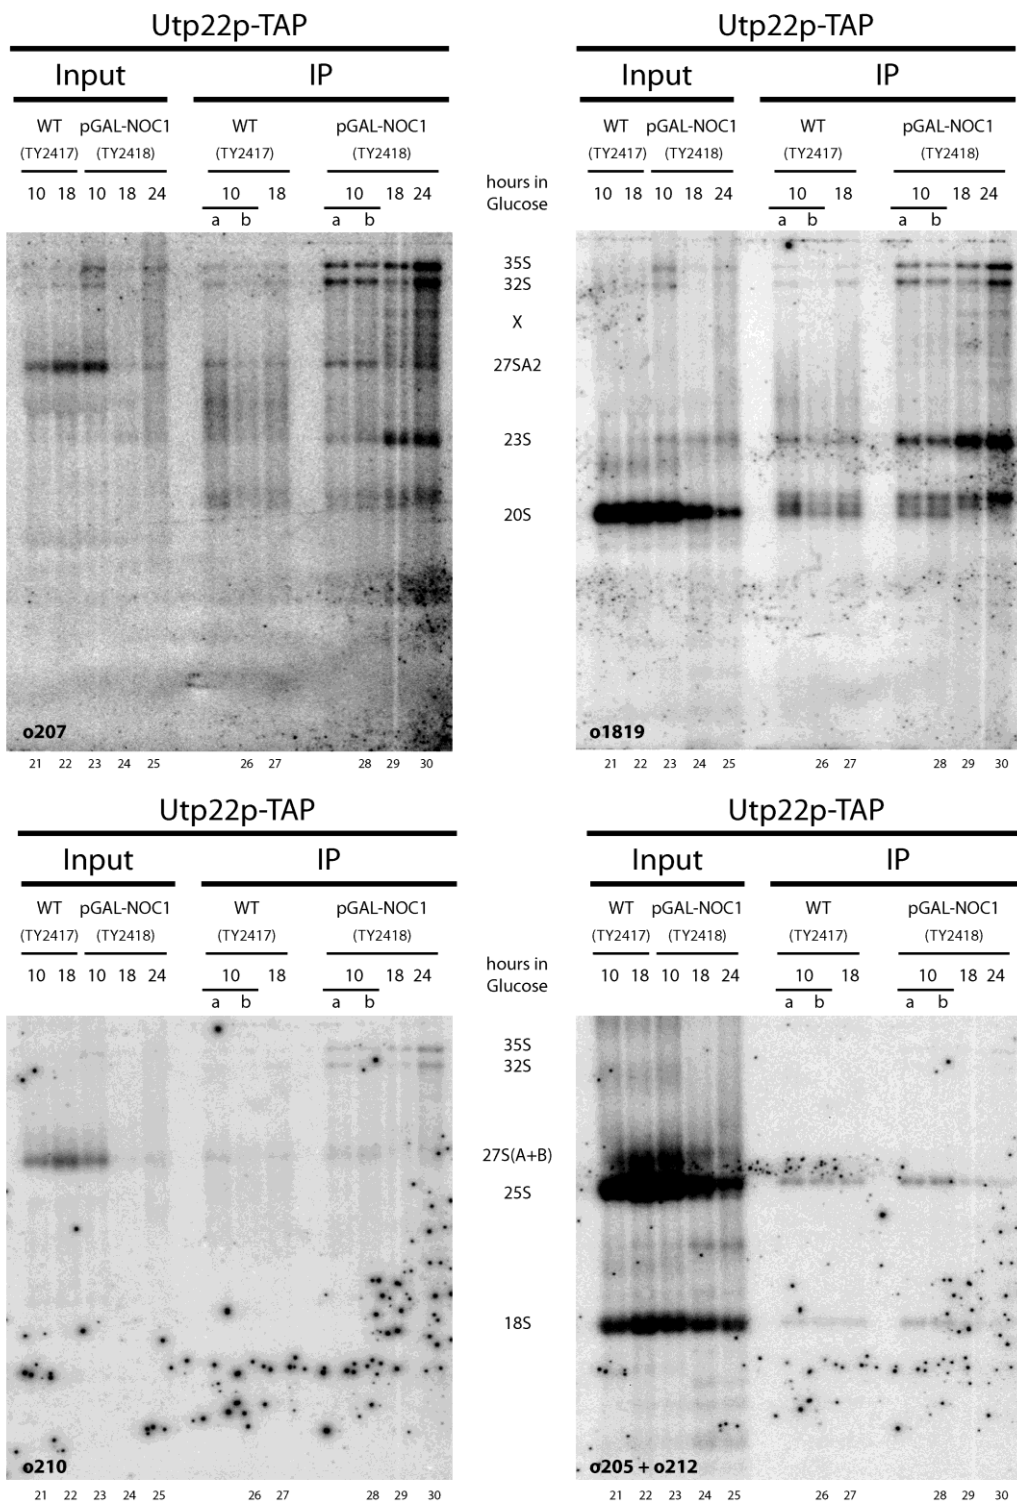

## **Fig. S7 Analysis of the binding hierarchy of biogenesis factors to pre-ribosomal particles**

Shown are the whole Northern blots derived from agarose gels, from which the panels for the composite Figure 8 were excised. The probes used for hybridization are indicated in the lower left corners of the blots (see Fig. S1A for binding sites of the probes). Positions of major (pre-) rRNA species are marked, as are positions of aberrant pre-rRNA fragments resulting from depletion of biogenesis factors which are still co-purified with other factors (X). Labelling and numbering of the lanes correspond to the ones in Fig. 8 A-D. See legend to Fig. 8 for details. Unlabelled lanes are derived from unrelated experiments.

A) Noc1p-TAP purification after *in vivo* depletion of Rrp5p corresponding to Fig. 8A. B) Noc2p-TAP purification after *in vivo* depletion of Rrp5p corresponding to Fig. 8A. C) Rrp5p-TAP purification after *in vivo* depletion of Noc2p corresponding to Fig. 8B. D) Rrp5p-TAP purification after *in vivo* depletion of Noc1p corresponding to Fig. 8C. a, b) IPs were performed in duplicate from the same cell extract. E) Utp22p-TAP purification after *in vivo* depletion of Noc1p corresponding to Fig. 8C. a, b) IPs were performed in duplicate from the same cell extract.

## **Supplementary Methods:**

### **Sucrose Density Gradient Centrifugation**

Isolation of ribosomes under low salt conditions by sucrose gradient centrifugation was performed as described (1).

### **Chromatin immunoprecipitation (ChIP) and PCR based analysis of co-purified DNA after RNase treatment**

ChIP experiments after RNase treatment of the chromatin fractions were performed according to (8). Briefly, yeast strains in which Noc1p (TY483), Noc2p (TY577), Rrp5p (TY615), Utp4p (TY1540) or Rpa135p (TY2423) are expressed as ProteinA or TAP-tag fusion proteins were grown in 120 ml rich medium at 30°C to exponential phase (OD<sub>600</sub> = 0.5-0.7), subsequently cross linked using formaldehyde (final concentration 1%) for 15' at 30°C and harvested in two aliquots of 50 ml each. From each cell pellet, the chromatin fraction was prepared as described in the Material and Methods section. Chromatin fractions from the same strains were pooled, and two aliquots of each pooled fraction were treated either with 10 U of RNase A and 400 U of RNase T1 (RNase A/T1 cocktail, Ambion) or an equivalent volume of lysis buffer. After incubating at 25°C for 40 min, input samples of the RNase treated and untreated chromatin were taken and immunoprecipitation of the remaining solution was performed as described in the Material and Methods section. After the last washing step, an aliquot of the precipitated material (10% or 20%) was prepared for Western blot analysis. Samples for Western blot analysis were incubated in 1x Laemmli protein sample buffer (9) at 95°C for 15' to reverse the formaldehyde cross link.

## Supplementary references:

1. Bassler,J., Grandi,P., Gadal,O., Lessmann,T., Petfalski,E., Tollervey,D., Lechner,J. and Hurt,E. (2001) Identification of a 60S preribosomal particle that is closely linked to nuclear export. *Mol. Cell*, **8**, 517–529.
2. Milkereit,P., Gadal,O., Podtelejnikov,A., Trumtel,S., Gas,N., Petfalski,E., Tollervey,D., Mann,M., Hurt,E. and Tschochner,H. (2001) Maturation and intranuclear transport of pre-ribosomes requires Noc proteins. *Cell*, **105**, 499–509.
3. Cadwell,C., Yoon,H.J., Zebarjadian,Y. and Carbon,J. (1997) The yeast nucleolar protein Cbf5p is involved in rRNA biosynthesis and interacts genetically with the RNA polymerase I transcription factor RRN3. *Mol. Cell. Biol.*, **17**, 6175–6183.
4. Venema,J. and Tollervey,D. (1996) RRP5 is required for formation of both 18S and 5.8S rRNA in yeast. *EMBO J.*, **15**, 5701–5714.
5. Berger,I., Fitzgerald,D.J. and Richmond,T.J. (2004) Baculovirus expression system for heterologous multiprotein complexes. *Nat. Biotechnol.*, **22**, 1583–1587.
6. Fitzgerald,D.J., Berger,P., Schaffitzel,C., Yamada,K., Richmond,T.J. and Berger,I. (2006) Protein complex expression by using multigene baculoviral vectors. *Nat. Methods*, **3**, 1021–1032.
7. Eppens,N.A., Rensen,S., Granneman,S., Raué,H.A. and Venema,J. (1999) The roles of Rrp5p in the synthesis of yeast 18S and 5.8S rRNA can be functionally and physically separated. *RNA*, **5**, 779–793.
8. Abruzzi,K.C., Lacadie,S. and Rosbash,M. (2004) Biochemical analysis of TREX complex recruitment to intronless and intron-containing yeast genes. *EMBO J.*, **23**, 2620–2631.
9. Laemmli,U.K. (1970) Cleavage of structural proteins during the assembly of the head of bacteriophage T4. *Nature*, **227**, 680–685.
